# Supplementary material
Source: PubMed Central journal article supplement (PMC10081950)
Supplement: NIHMS1867254-supplement-Suppl__Cover_Sheet.pdf [file NIHMS1867254-supplement-Suppl__Cover_Sheet.pdf]

# The 2022 Metrics of the HUPO Human Proteome Project

*Gilbert S. Omenn<sup>\*1, 2</sup>, Lydie Lane<sup>3</sup>, Christopher M Overall<sup>4</sup>, Charles Pineau<sup>5</sup>, Nicolle H. Packer<sup>6, 7</sup>, Ileana M. Cristea<sup>8</sup>, Cecilia Lindskog<sup>9</sup>, Susan T. Weintraub<sup>10</sup>, Sandra Orchard<sup>11</sup>, Michael H.A. Roehr<sup>12</sup>, Edouard Nice<sup>13</sup>, Siqi Liu<sup>14</sup>, Nuno Bandeira<sup>15</sup>, Yu-Ju Chen<sup>16</sup>, Tiannan Guo<sup>17</sup>, Ruedi Aebersold<sup>18</sup>, Robert L. Moritz<sup>2</sup>, and Eric W. Deutsch<sup>2</sup>*

<sup>1</sup>University of Michigan, Ann Arbor, Michigan 48109, United States, <sup>2</sup>Institute for Systems Biology, Seattle, Washington 98109, United States, <sup>3</sup>CALIPHO Group, SIB Swiss Institute of Bioinformatics, 1015 Lausanne, Switzerland, <sup>4</sup>University of British Columbia, Vancouver, BC V6T 1Z4, Canada, <sup>5</sup>French Institute of Health and Medical Research, 35042 RENNES Cedex, France, <sup>6</sup>Macquarie University, Sydney, NSW 2109, Australia, <sup>7</sup>Griffith University's Institute for Glycomics, Sydney, NSW 2109, Australia, <sup>8</sup>Princeton University, Princeton, New Jersey 08544, United States, <sup>9</sup>Uppsala University, 752 36 Uppsala, Sweden, <sup>10</sup>University of Texas Health Science Center-San Antonio, San Antonio, Texas 78229-3900, United States, <sup>11</sup>EMBL-EBI, Hinxton, Cambridgeshire, CB10 1SD, United Kingdom, <sup>12</sup>Memorial Sloan Kettering Cancer Center, New York, New York, 10065, United States, <sup>13</sup>Monash University, Clayton VIC 3800, Australia, <sup>14</sup>BGI Group, Shenzhen 518083, China, <sup>15</sup>University of California, San Diego, La Jolla, California 92093, United States, <sup>16</sup>National Taiwan University, Academia Sinica, Nankang, Taipei 11529, Taiwan, <sup>17</sup>Westlake University Guomics Laboratory of Big Proteomic Data, Hangzhou 310024, Zhejiang Province, China, <sup>18</sup>Institute of Molecular Systems Biology in ETH Zurich, 8092 Zurich, Switzerland

## Table of Contents

- Supplementary Table 1. The 868 PE1 proteins WITHOUT mass spectrometry evidence from the PeptideAtlas-MassIVE-neXtProt pipeline
- Supplementary Table 2. MassIVE datasets with 10+ new proteins with MS evidence for this latest release
